# Supplementary material for: Association between Hyperosmolar Hyperglycemic State and Venous Thromboembolism in Diabetes Patients: A Nationwide Analysis in Taiwan
Source: MDPI journal article supplement (doi:10.3390/jpm12020302), 2022-02-17
Supplement: s1 [file s1]

## Supplementary Materials

**Table S1.** Main admission diagnosis codes.

| Diagnosis                 | ICD-9-CM Codes                                                                               | ICD-10-CM Codes                         |
|---------------------------|----------------------------------------------------------------------------------------------|-----------------------------------------|
| Sepsis                    | 790.7, 038.xx, 995.91, 995.92, 785.52                                                        | R78.81, A40, A41.9, R65.20, A41, R65.21 |
| Respiratory tract disease | 460.xx-466.xx, 470.xx-478.xx, 490.xx-496.xx, 487.xx-488.xx, 500.xx-508.xx, and 510.xx-519.xx | J00-J11, J19-J99                        |
| Heart disease             | 398.91, 402.xx, 404.xx, 410.xx-414.xx, 420.xx-428.xx                                         | I09.81, I11, I13, I21-I25, I32-I50      |
| Pneumonia                 | 480.xx-486.xx                                                                                | J12-J18                                 |
| Stroke                    | 430.xx-436.xx                                                                                | I60-I67                                 |
| Malignancy                | 140.xx-208.xx                                                                                | C00-C96, Z51                            |
| Urinary tract infection   | 590.1, 590.2, 599.0                                                                          | N10, N15.1, N39.0                       |

Abbreviations: ICD-9-CM = International Classification of Diseases, 9th Revision, Clinical Modification; ICD-10-CM = International Classification of Diseases, 10th Revision, Clinical Modification.

**Table S2.** Odds ratio of DVT in HHS versus non-HHS admissions based on different main admission diagnoses.

| Main Diagnosis            | Group   | Univariate Model  |         | Multivariable Model <sup>†</sup> |         |
|---------------------------|---------|-------------------|---------|----------------------------------|---------|
|                           |         | Crude OR (95% CI) | p Value | Adjusted OR (95% CI)             | p Value |
| Pneumonia                 | HHS     | 1.06 (0.75–1.49)  | 0.739   | 1.11 (0.79–1.57)                 | 0.534   |
|                           | Non-HHS | 1.00 (ref.)       |         | 1.00 (ref.)                      |         |
| Urinary tract infection   | HHS     | 2.02 (1.29–3.17)  | 0.002   | 1.95 (1.26–3.03)                 | 0.003   |
|                           | Non-HHS | 1.00 (ref.)       |         | 1.00 (ref.)                      |         |
| Sepsis                    | HHS     | 1.16 (0.92–1.47)  | 0.210   | 1.24 (0.97–1.57)                 | 0.080   |
|                           | Non-HHS | 1.00 (ref.)       |         | 1.00 (ref.)                      |         |
| Heart disease             | HHS     | 0.99 (0.76–1.27)  | 0.911   | 0.98 (0.77–1.26)                 | 0.889   |
|                           | Non-HHS | 1.00 (ref.)       |         | 1.00 (ref.)                      |         |
| Stroke                    | HHS     | 1.44 (0.87–2.36)  | 0.154   | 1.38 (0.84–2.27)                 | 0.199   |
|                           | Non-HHS | 1.00 (ref.)       |         | 1.00 (ref.)                      |         |
| Malignancy                | HHS     | 1.38 (1.01–1.88)  | 0.043   | 1.34 (0.89–1.83)                 | 0.065   |
|                           | Non-HHS | 1.00 (ref.)       |         | 1.00 (ref.)                      |         |
| Respiratory tract disease | HHS     | 1.02 (0.75–1.40)  | 0.883   | 1.05 (0.77–1.44)                 | 0.748   |
|                           | Non-HHS | 1.00 (ref.)       |         | 1.00 (ref.)                      |         |

<sup>†</sup> Multivariable logistic regression model with adjustments for all baseline characteristics shown in Table1. Abbreviations: HHS = hyperosmolar hyperglycemic state; OR = odds ratio; DVT = deep venous thrombosis; CI = confidence interval; ref. = reference.

**Table S3.** Odds ratio of PE in HHS versus non-HHS admissions based on different main admission diagnoses.

| Main Diagnosis            | Group   | Univariate Model  |         | Multivariable Model † |         |
|---------------------------|---------|-------------------|---------|-----------------------|---------|
|                           |         | Crude OR (95% CI) | p Value | Adjusted OR (95% CI)  | p Value |
| Pneumonia                 | HHS     | 1.25 (0.90–1.73)  | 0.191   | 1.24 (0.89–1.74)      | 0.200   |
|                           | Non-HHS | 1.00 (ref.)       |         | 1.00 (ref.)           |         |
| Urinary tract infection   | HHS     | 1.43 (0.69–2.96)  | 0.338   | 1.36 (0.65–2.83)      | 0.412   |
|                           | Non-HHS | 1.00 (ref.)       |         | 1.00 (ref.)           |         |
| Sepsis                    | HHS     | 1.02 (0.75–1.40)  | 0.892   | 0.94 (0.68–1.30)      | 0.725   |
|                           | Non-HHS | 1.00 (ref.)       |         | 1.00 (ref.)           |         |
| Heart disease             | HHS     | 0.96 (0.67–1.37)  | 0.820   | 0.87 (0.60–1.26)      | 0.458   |
|                           | Non-HHS | 1.00 (ref.)       |         | 1.00 (ref.)           |         |
| Stroke                    | HHS     | 1.44 (0.70–2.95)  | 0.317   | 1.39 (0.67–2.87)      | 0.380   |
|                           | Non-HHS | 1.00 (ref.)       |         | 1.00 (ref.)           |         |
| Malignancy                | HHS     | 1.44 (0.40–1.44)  | 0.392   | 0.74 (0.38–1.44)      | 0.378   |
|                           | Non-HHS | 1.00 (ref.)       |         | 1.00 (ref.)           |         |
| Respiratory tract disease | HHS     | 0.78 (0.58–1.07)  | 0.125   | 0.77 (0.56–1.06)      | 0.104   |
|                           | Non-HHS | 1.00 (ref.)       |         | 1.00 (ref.)           |         |

† Multivariable logistic regression model with adjustments for all baseline characteristics shown in Table1. Abbreviations: HHS = hyperosmolar hyperglycemic state; OR = odds ratio; PE = pulmonary embolism; CI = confidence interval; ref. = reference.
